# Supplementary material for: Soft Actuated Hybrid Hydrogel with Bioinspired Complexity to Control Mechanical Flexure Behavior for Tissue Engineering
Source: PubMed Central journal article supplement (PMC7407768; doi:10.3390/nano10071302), 2020-07-03
Supplement: nanomaterials-10-01302-s001.pdf [file nanomaterials-10-01302-s001.pdf]

# Soft Actuated Hybrid Hydrogel with Bioinspired Complexity to Control Mechanical Flexure Behavior for Tissue Engineering

Ramón Rial <sup>1</sup>, Zhen Liu <sup>2</sup> and Juan M. Ruso <sup>1,\*</sup>

<sup>1</sup> Soft Matter and Molecular Biophysics Group, Department of Applied Physics, University of Santiago de Compostela, 15782 Santiago de Compostela, Spain; ramon.rial@usc.es

<sup>2</sup> Department of Physics and Engineering, Frostburg State University, Frostburg, MD 21532, USA; zliu@frostburg.edu

\* Correspondence: juanm.ruso@usc.es

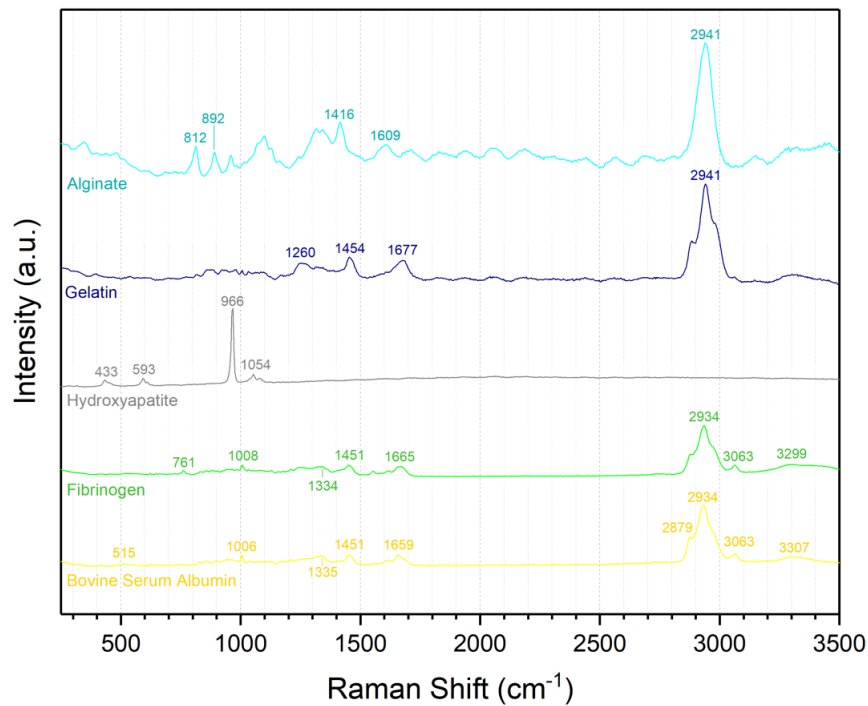

Figure S1. Raman spectra of the different compounds of the hydrogels.

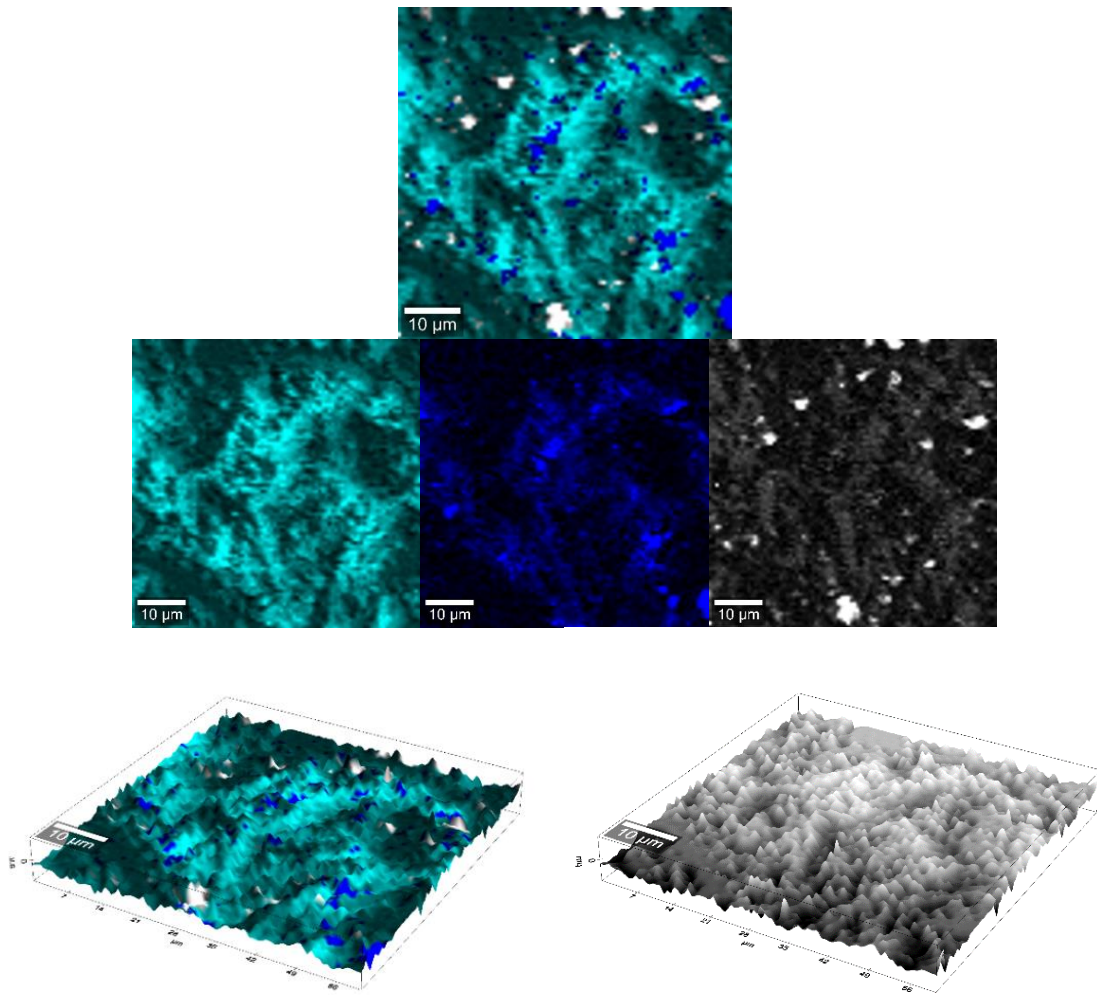

**Figure S2.** Gel/Alg/HAp hydrogel. Up, Compound distribution. Middle, single compounds. Bottom, surface map. Dark turquoise represents alginate distribution, navy blue gelatin and white Hydroxyapatite, respectively.

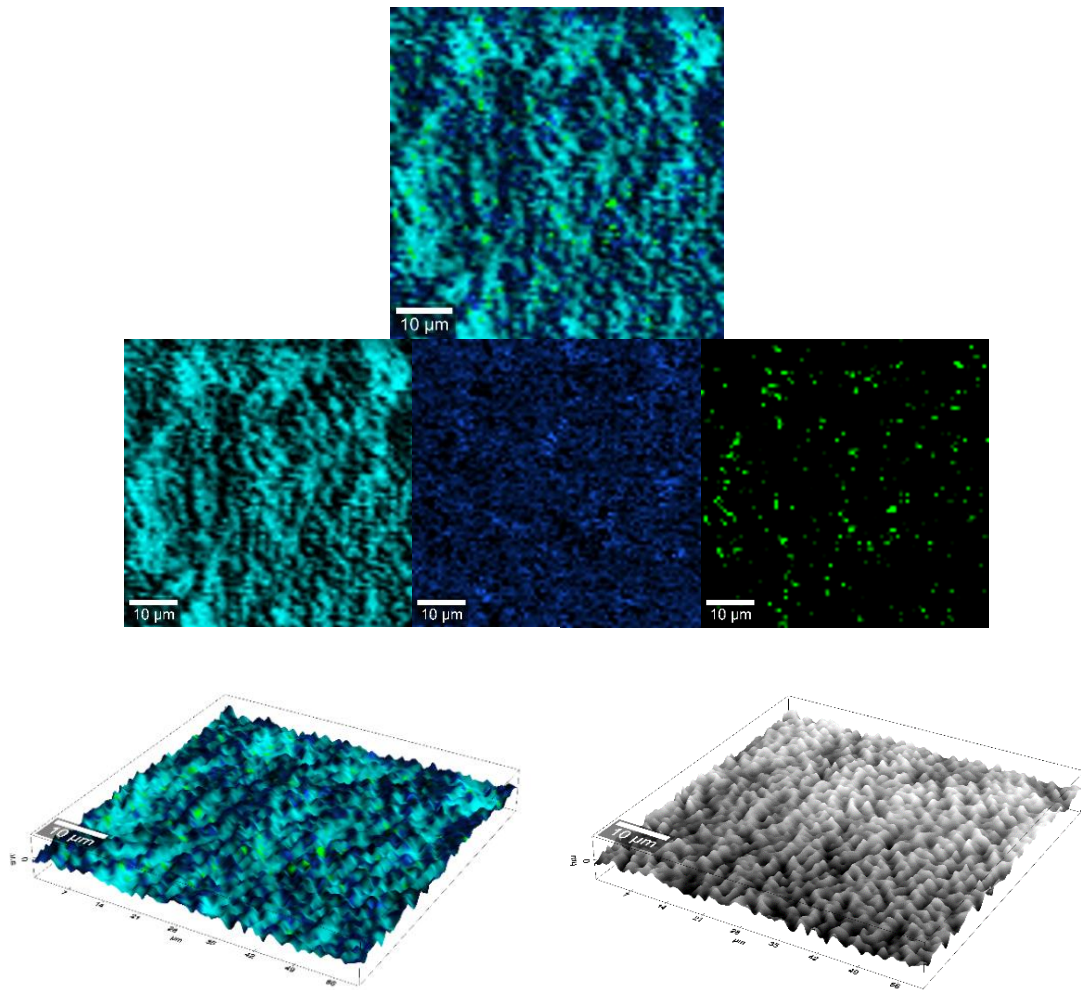

**Figure S3.** Gel/Alg/Fib hydrogel. Up, Compound distribution. Middle, single compounds. Bottom, surface map. Dark turquoise represents alginate distribution, navy blue gelatin and green fibrinogen, respectively.

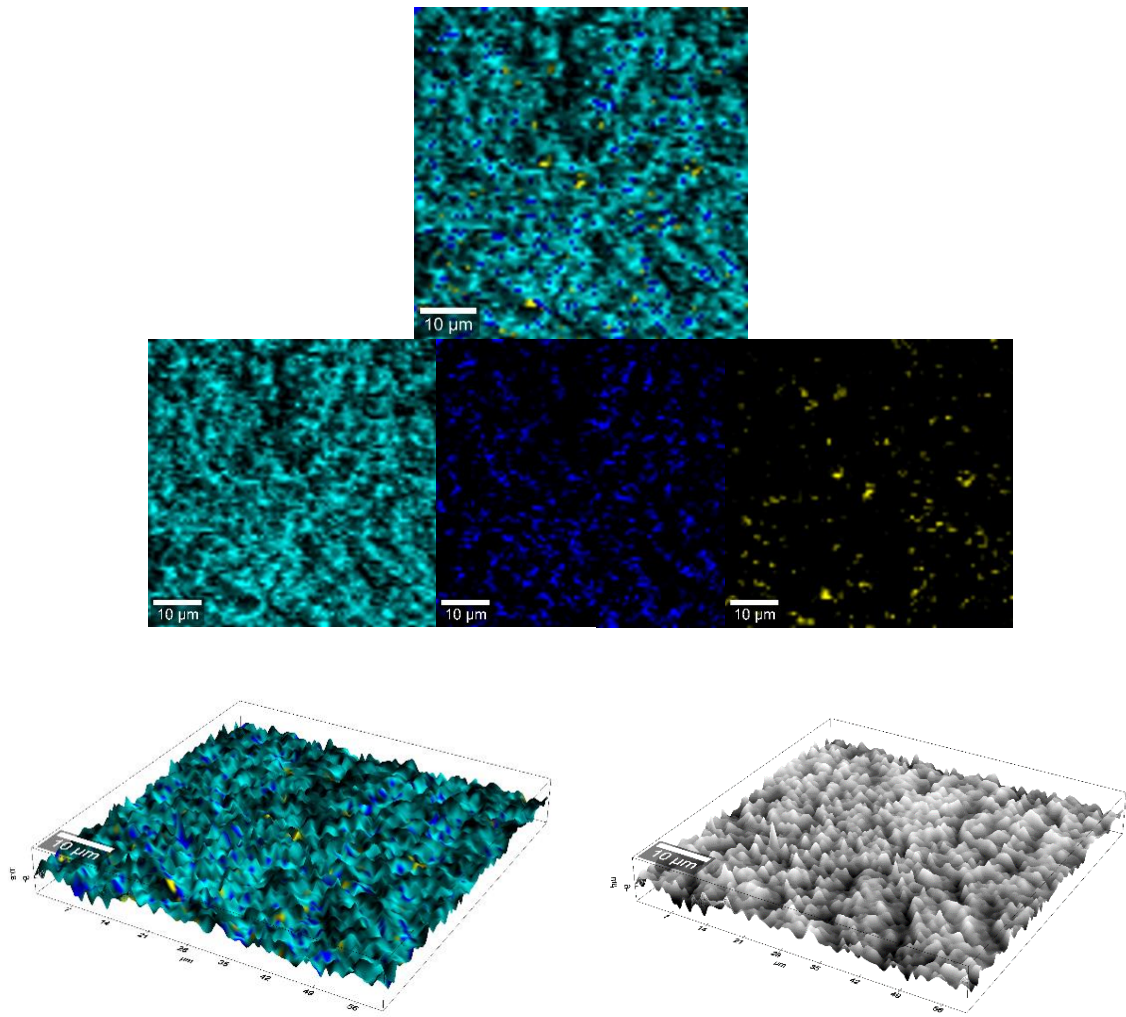

**Figure S4.** Gel/Alg/BSA hydrogel. Up, Compound distribution. Middle, single compounds. Bottom, surface map. Dark turquoise represents alginate distribution, navy blue gelatin and yellow BSA, respectively.

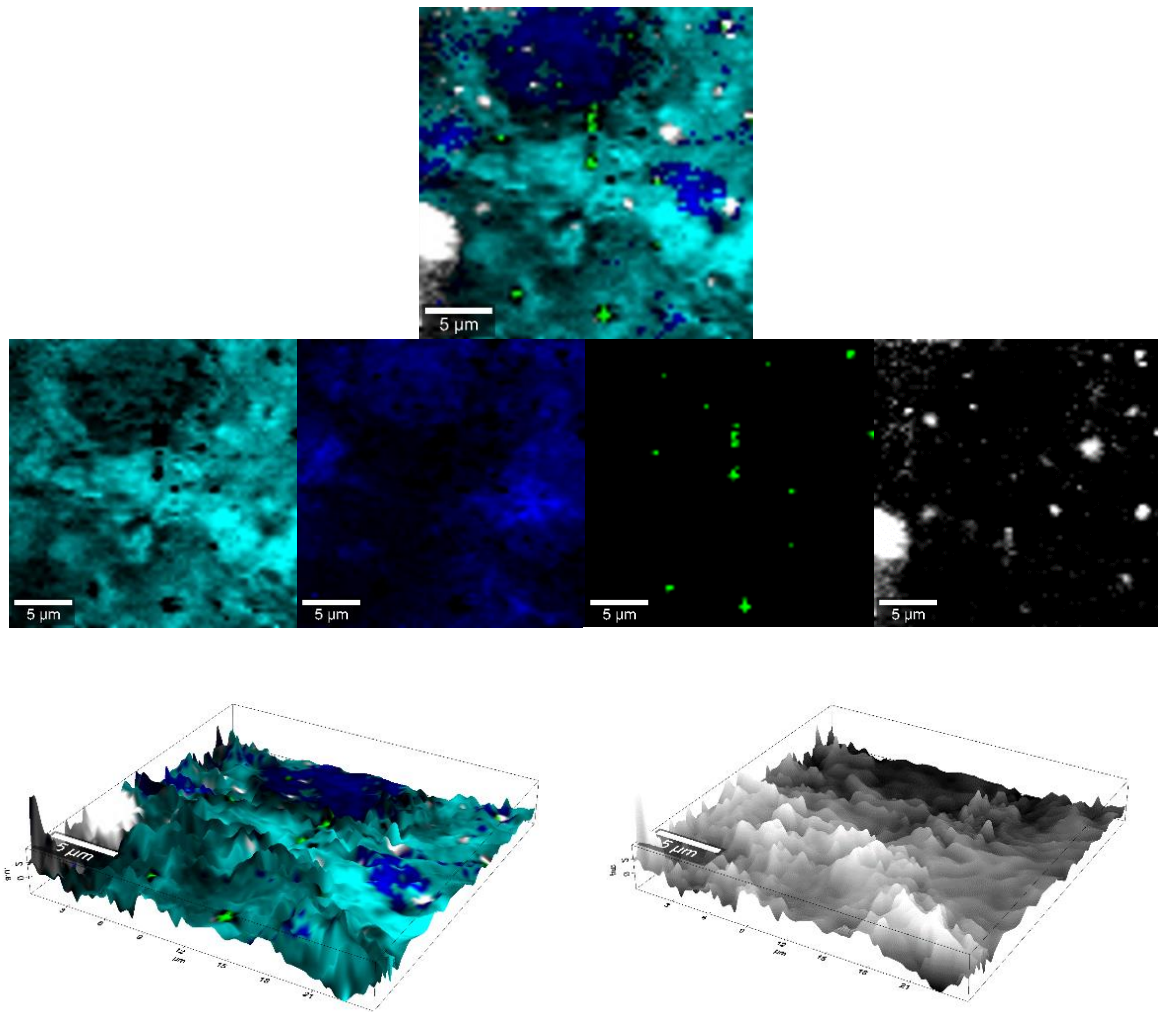

**Figure S5.** Gel/Alg/Fib/HAp hydrogel. Up, Compound distribution. Middle, single compounds. Bottom, surface map. Dark turquoise represents alginate distribution, navy blue gelatin, green fibrinogen and white Hydroxyapatite, respectively.

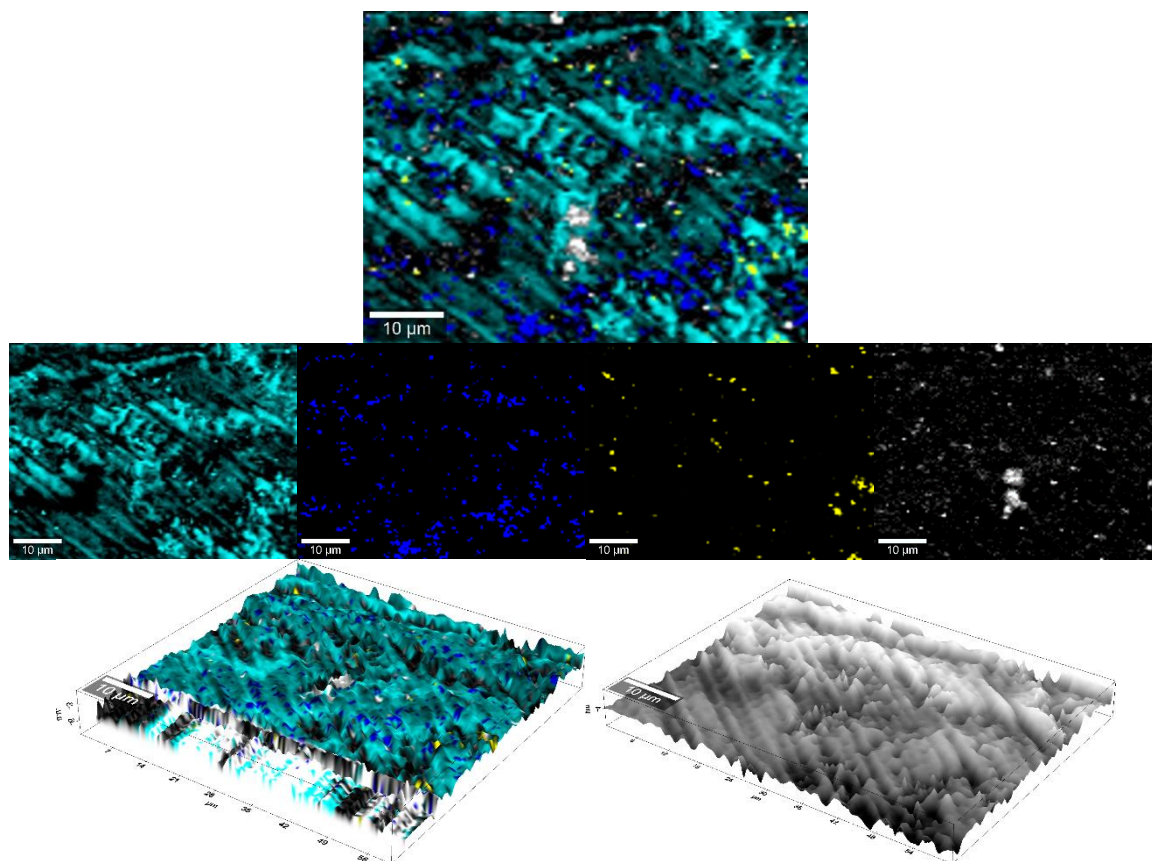

**Figure S6.** Gel/Alg/BSA/HAp hydrogel. Up, Compound distribution. Middle, single compounds. Bottom, surface map. Dark turquoise represents alginate distribution, navy blue gelatin, yellow BSA and white Hydroxyapatite, respectively.

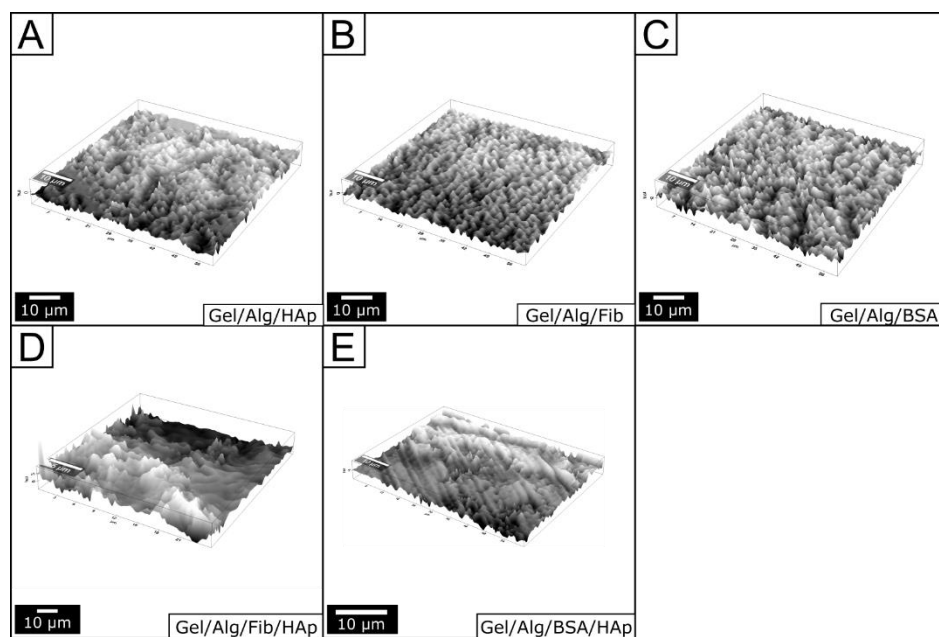

**Figure S7.** 3D surfaces of the studied samples. The root mean square roughness ( $R_q$ ), roughness arithmetical average deviation ( $R_a$ ), Skewness ( $R_{sw}$ ) and Kurtosis ( $R_{ku}$ ) coefficients of these samples can be consulted in the Table below.

**Table S1.** Root mean square roughness (Rq), roughness arithmetical average deviation (Ra), Skewness (Rsw) and Kurtosis (Rku) coefficients of the studied samples

|          | R <sub>q</sub> | R <sub>a</sub> | R <sub>sw</sub> | R <sub>ku</sub> |
|----------|----------------|----------------|-----------------|-----------------|
| Sample A | 225.9          | 213.3          | 1.09            | 1.21            |
| Sample B | 235.5          | 228.1          | 1.06            | 1.13            |
| Sample C | 235.2          | 228.6          | 1.05            | 1.12            |
| Sample D | 235.3          | 227.4          | 1.06            | 1.13            |
| Sample E | 211.8          | 199.6          | 1.15            | 1.30            |

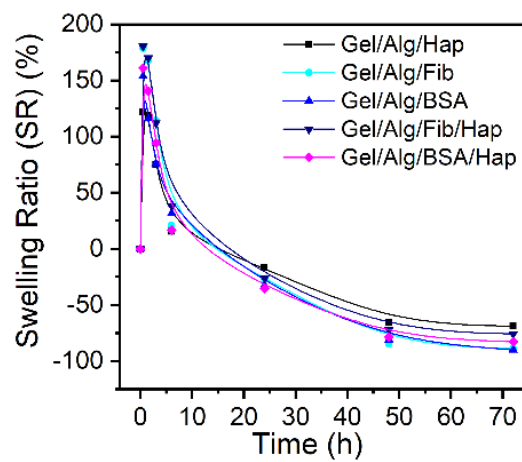

**Figure S8.** Swelling behaviour over time. Lyophilized samples.

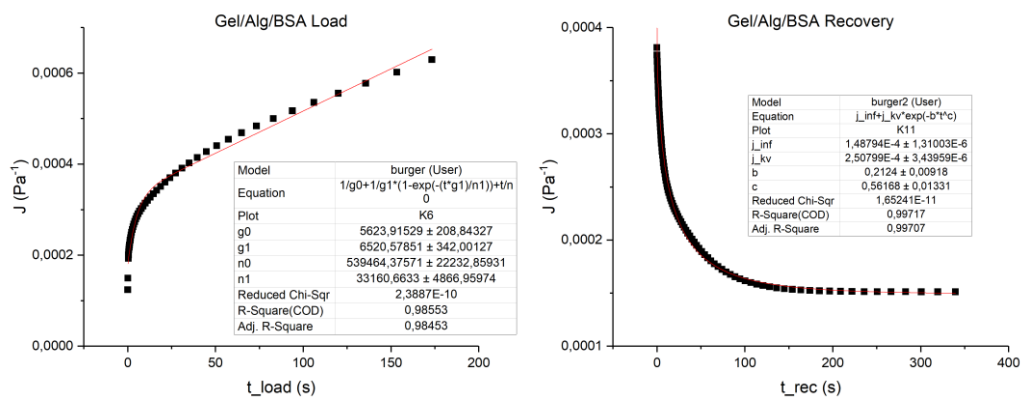

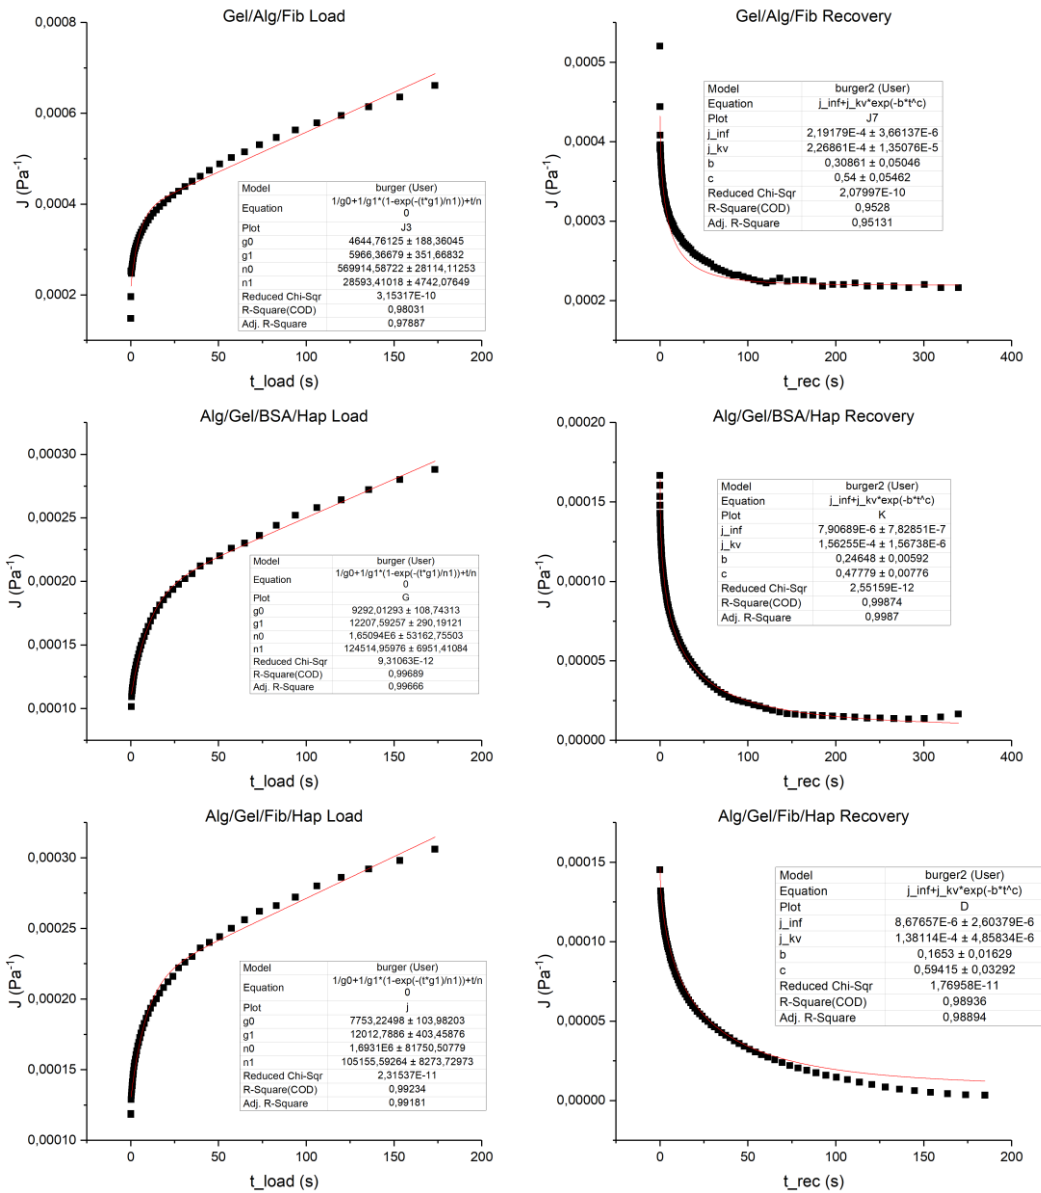

**Figure S9.** Fitting results for the Burger model in the creep tests. Load and recovery phases are depicted with each respective fitting equation.
